# Supplementary material
Source: PubMed Central journal article supplement (PMC2630104)
Supplement: 0808362106_0808362106SI.pdf [file 0808362106_0808362106SI.pdf]

# Supporting Information

Rathelot and Strick 10.1073/pnas.0808362106

**Table S1. Experimental animals, second-order cells**

| Exp. | Age, mo | Sex | Weight, kg | Muscle | Vol, mL | Time, h | CM cells, no. | Virus batch* |
|------|---------|-----|------------|--------|---------|---------|---------------|--------------|
| JA39 | 65      | M   | 7.3        | lTri   | 1.5     | 107     | 272           | 09/04        |
| JA49 | 39      | F   | 4.5        | lTri   | 1.0     | 84      | 158           | 05/06        |
| JA51 | 38      | F   | 4.5        | SpD    | 0.5     | 80.5    | 334           | 05/06        |
| JA54 | 36      | F   | 3.9        | SpD    | 0.5     | 80      | 814           | 05/06        |

The table lists information about the 4 animals included in the analysis of elbow and shoulder cortico-motoneuronal (CM) cells. Exp, the animal number; lTri, lateral head of the triceps; SpD, spinodeltoid muscle; Vol, the amount of virus injected into the muscle; Time, the survival time after injection of virus; CM cells, number of labeled CM cells in areas 4 and 3a (the values have been adjusted for the number of sections scanned; cell counts include labeled somas in which the nucleus was in the plane of the section).

\*Virus batch, the batch of rabies N2c strain injected. We used 2 batches of virus in these experiments; batches differed in their rate of retrograde transneuronal transport to second-order neurons.

**Table S2. Experimental animals, third-order cells**

| Exp. | Age, mo | Sex | Weight, kg | Muscle | Vol, mL | Time, h | Virus batch* |
|------|---------|-----|------------|--------|---------|---------|--------------|
| JA7  | >40     | F   | 4.2        | EDC    | 0.5     | 121     | 04/98        |
| JA9  | 46      | M   | 5.2        | EDC    | 0.5     | 128     | 04/98        |
| JA20 | 52      | M   | 4.4        | EDC    | 0.5     | 126     | 12/00        |
| JA29 | 36      | M   | 3.8        | ABPL   | 0.25    | 108     | 06/03        |
| JA42 | 57      | F   | 5.7        | SpD    | 0.5     | 108     | 09/04        |
| JA43 | 60      | F   | 5.0        | SpD    | 0.5     | 95.5    | 11/05        |
| JA48 | 38      | F   | 4.8        | SpD    | 0.5     | 86.5    | 05/06        |
| JA53 | 35      | F   | 4.5        | SpD    | 0.5     | 95      | 05/06        |

The table lists information about the 8 animals included in the analysis of transport to third-order neurons in layer III. The format is the same as Table S1. EDC, extensor digitorum communis; ABPL, abductor pollicis longus.

\*We used 6 batches of virus in these experiments; batches of virus differed in their rate of retrograde transneuronal transport to third-order neurons.
